# Supplementary material for: A type III-A CRISPR–Cas system mediates co-transcriptional DNA cleavage at the transcriptional bubbles in close proximity to active effectors
Source: PubMed Central journal article supplement — Nucleic Acids Res. 2021 Jul 1;49(13):7628–43. doi: 10.1093/nar/gkab590 (PMC8287949; doi:10.1093/nar/gkab590), 2021-07-01
Supplement: gkab590_supplemental_file.pdf [file gkab590_supplemental_file.pdf]

**Supplemental data to**  
**A type III CRISPR-Cas system mediates co-transcriptional DNA cleavage at the transcriptional bubbles in close proximity to active effectors**

Jinzhong Lin<sup>1,2</sup>, Yulong Shen<sup>1</sup>, Jinfeng Ni<sup>1\*</sup> and Qunxin She<sup>1,2\*</sup>

<sup>1</sup> CRISPR and Archaea Biology Research Center, State Key Laboratory of Microbial Technology, Shandong University, 72 Binhai Road, Jimo, Qingdao, Shandong, 266237, P.R. China

<sup>2</sup> Archaea Centre, Department of Biology, University of Copenhagen, Ole Maaløes Vej 5, DK-2200 Copenhagen N, Denmark

\*To whom correspondence should be addressed. Tel: +45 53-258631522; Fax: +45 532-88369278; Email: shequnxin@sdu.edu.cn; correspondence can also be directed to jinfgni@sdu.edu.cn.

This file includes:

Figures S1 to S8

Tables S1 to S2

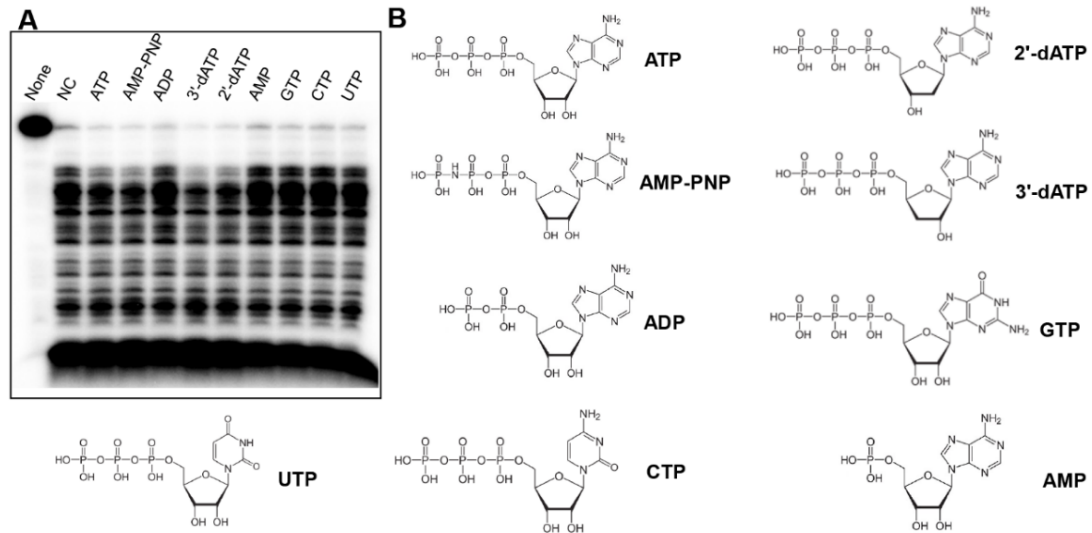

**Figure S1 Effect of ATP and its analogues on the ssDNAse Activity of LdCsm complex. (A)** RNA-activated ssDNA cleavage of LdCsm in the presence of ATP or its analogues. NC: Negative control without ATP. **(B)** Structures of ATP and its analogues.

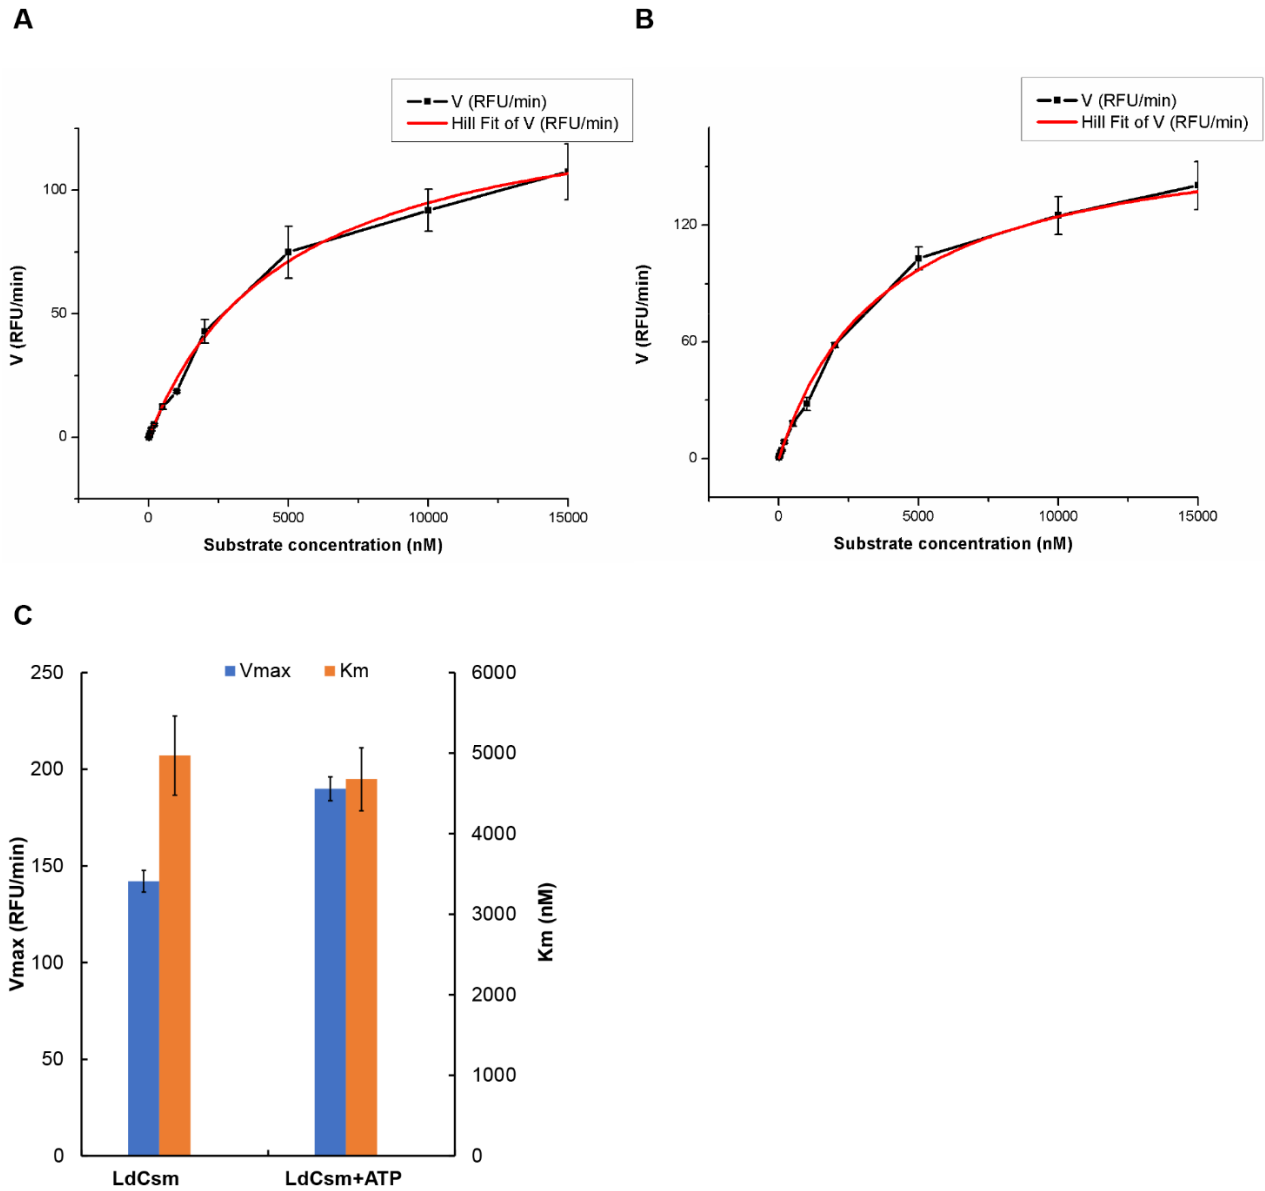

**Figure S2 Michaelis-Menten modeling of ssDNA cleavage by LdCsm complex. (A & B)** Michaelis-Menten modeling of LdCsm ssDNA cleavage in the absence (A) or presence (B) of ATP. The fluorescence production rates (V) were calculated for all tested substrate concentrations [S] and plotted against the substrate concentrations. The resulting curves were fitted with the Michaelis-Menten model. **(C)** The kinetic parameters of ssDNA degradation LdCsm with or without ATP. RFU: Relative Fluorescence Unit.

**A**

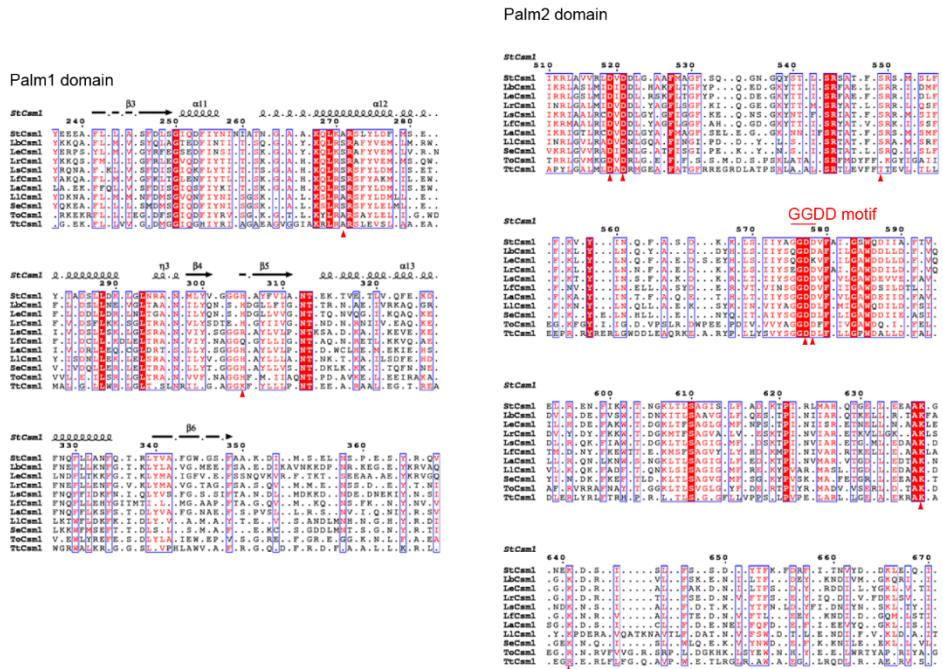

**Figure S3 Purification of LdCsm1 mutations. (A)** Conserved residues in LdCsm1. Ten Csm1 homologues: *Lactobacillus bulgaricus* (Lb), *Streptococcus thermophilus* (St), *Lactobacillus equicursoris* (Le), *Lactobacillus ruminis* (Lr), *Lactobacillus salivarius* (Ls), *Lactobacillus acidipiscis* (La), *Lactococcus lactis* subsp. *lactis* (Ll), *Staphylococcus epidermidis* (Se), *Thermococcus onnurineus* (To) and *Thermus thermophilus* (Tt) were selected and aligned using MEGA5 (1) and visualized using ESPrnt 3 (2). Some highly conserved residues marked with red arrows were chosen to produce the LdCsm1 variants. **(B)** Coomassie blue-stained SDS-PAGE gel of protein components of the wild-type and mutated LdCsm1 effector complexes. M: protein size marker.

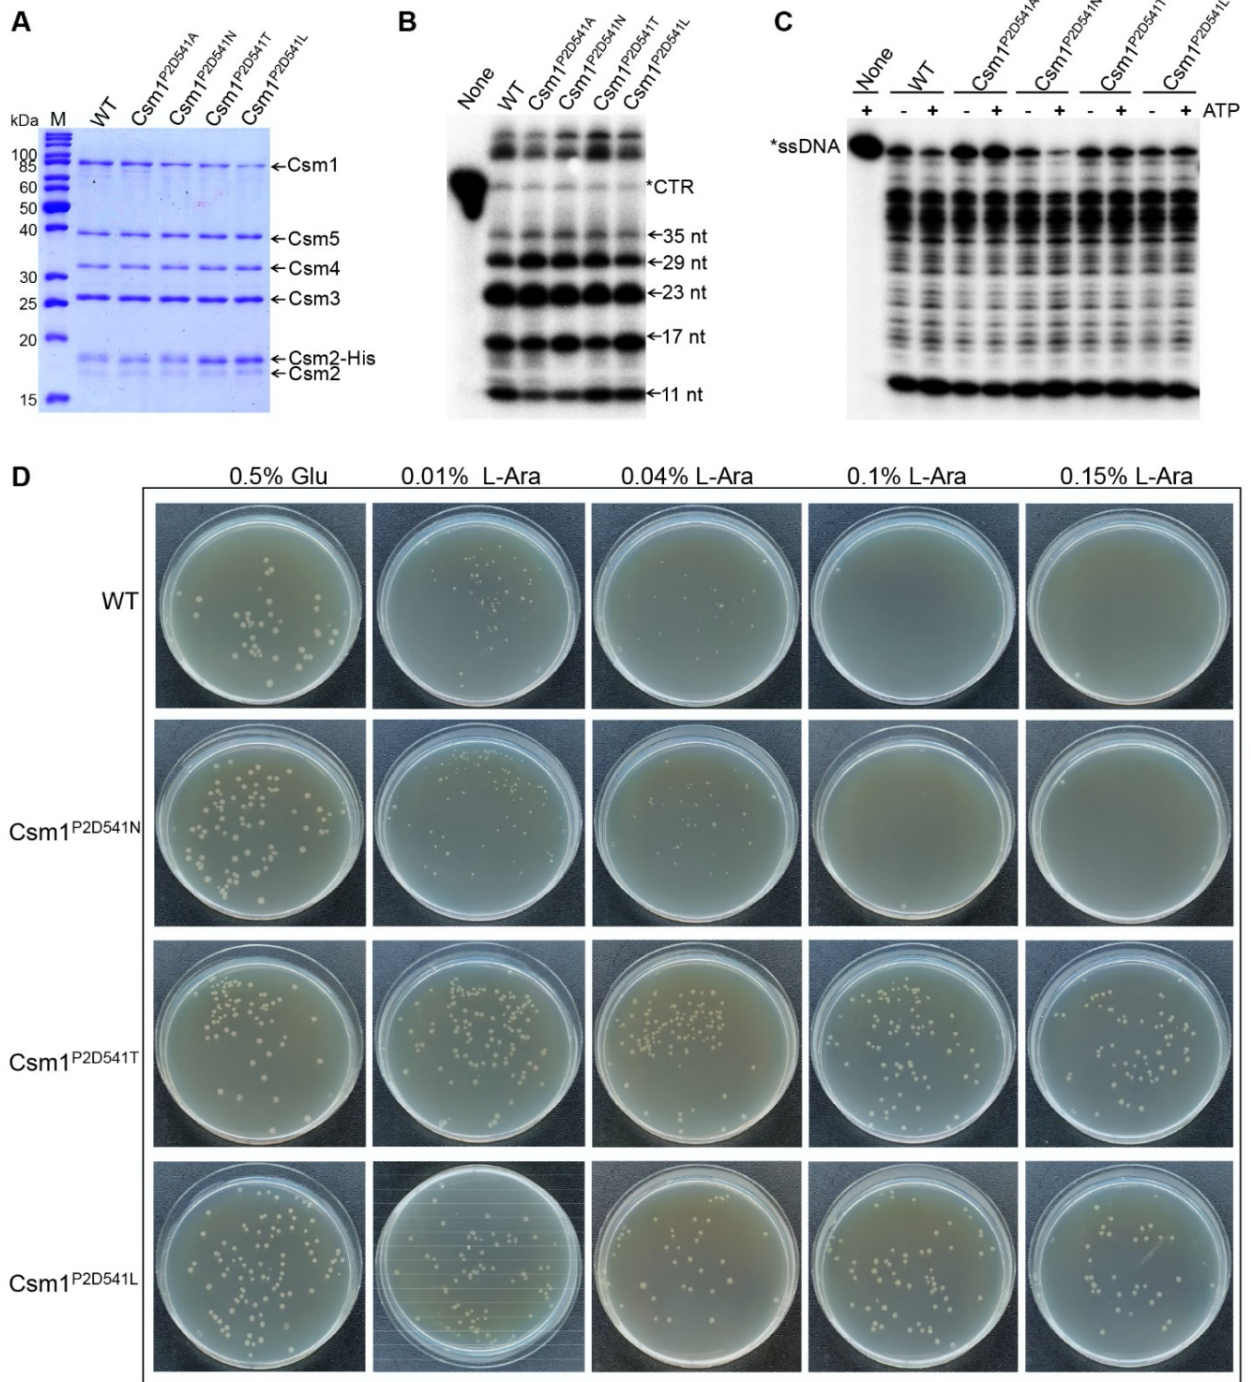

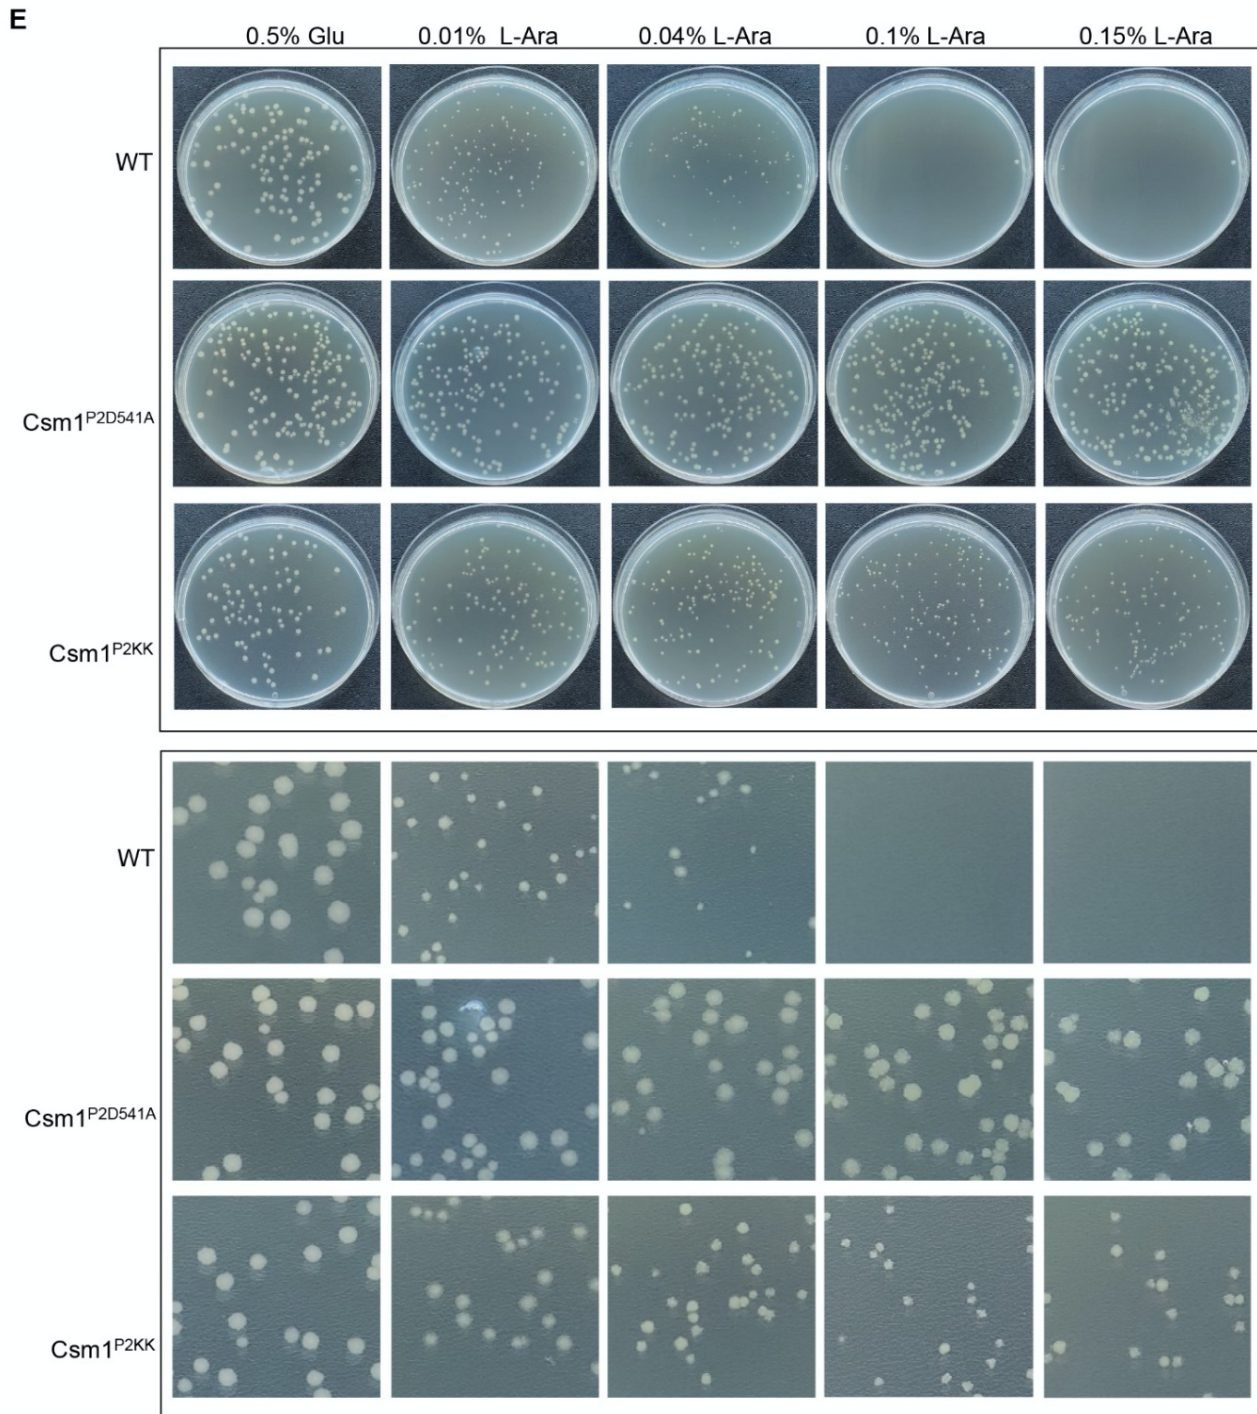

**Figure S4 Effect of LdCsm1 D541 mutations on the target RNA cleavage, ssDNA cleavage and the *in vivo* anti-plasmid activity of the LdCsm system. (A) SDS-PAGE analysis of protein components of LdCsm effectors carrying LdCsm1 D541 mutations, M: protein size marker. (B) Effect of LdCsm1 D541 mutations on the target RNA cleavage. (C) Effect of LdCsm1 D541 mutations on the RNA-activated ssDNA cleavage in the presence of ATP. (D) Effect of LdCsm1 D541 mutations on the anti-plasmid activity. (E) Effect of other Palm 2 mutation of LdCsm1 on the anti-plasmid activity. LdCsm1 mutations tested: D541N (Csm1<sup>P2D541N</sup>), D541L (Csm1<sup>P2D541L</sup>), D541T (Csm1<sup>P2D541T</sup>), D541A (Csm1<sup>P2D541A</sup>) and K659/K663A (Csm1<sup>P2KK</sup>).**

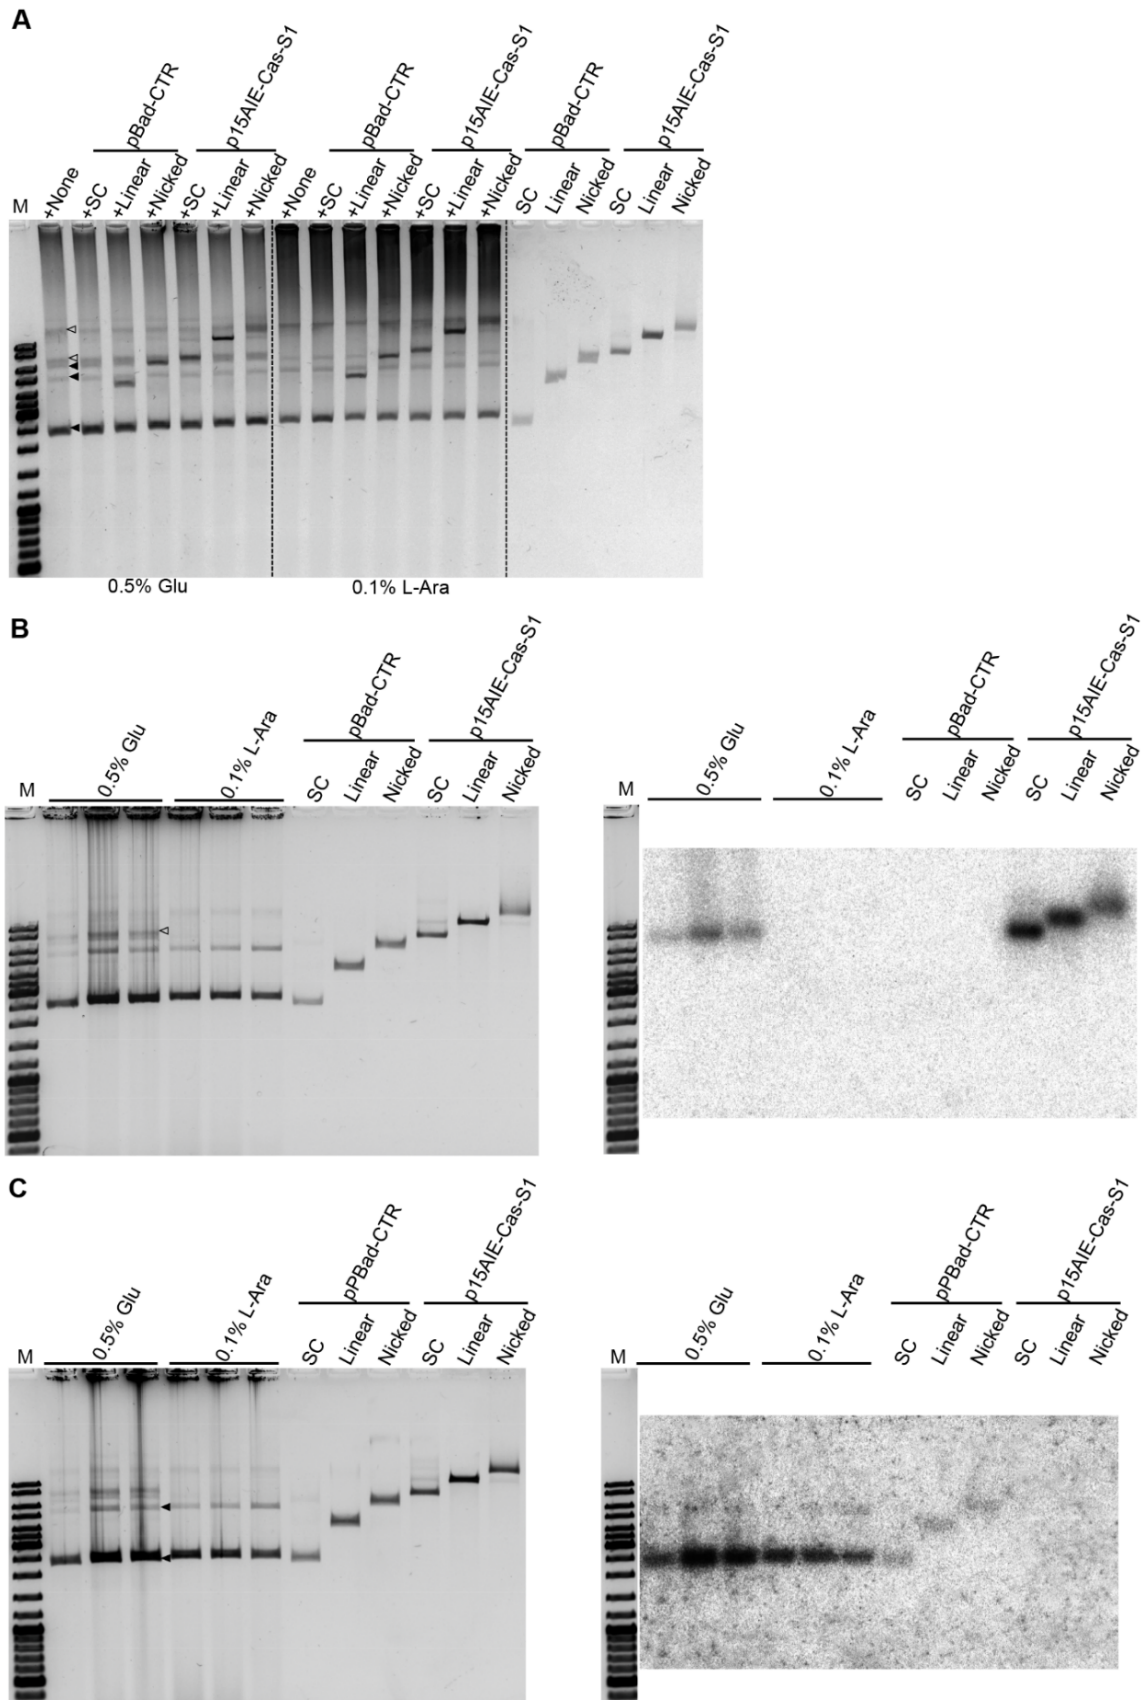

**Figure S5** Detection of p15AIE-Cas-S1 and pBad-CTR in miniprep assay. **(A)** Agarose gel analysis of plasmid DNAs mini prepared from *E. coli* colonies addition with different pattern of p15AIE-Cas-S1 and

pBad-CTR. The plasmid DNAs were prepared from 0.5% glucose and 0.1% L-arabinose colonies, respectively. SC, supercoiled. Empty triangles represent supercoiled (bottom) and nicked (top) of p15AIE-Cas-S1, filled triangles represent supercoiled (bottom) and nicked (top) of pBad-CTR, the middle triangle represent an unclassified band of pBad-CTR, which be indicated by southern blotting in (C). (B & C) Southern blotting analysis of p15AIE-Cas-S1 and pBad-CTR. **Left panel**, Gel-Red<sup>®</sup> staining before transfer. Empty triangle represents p15AIE-Cas-S1 band in (B), filled triangles represent pBad-CTR bands in (C). **Right panel**, southern blotting analysis of p15AIE-Cas-S1 and pBad-CTR, respectively. Empty triangles indicate the plasmid p15AIE-Cas-S1, filled triangles indicate the plasmid pBad-CTR. SC, supercoiled.



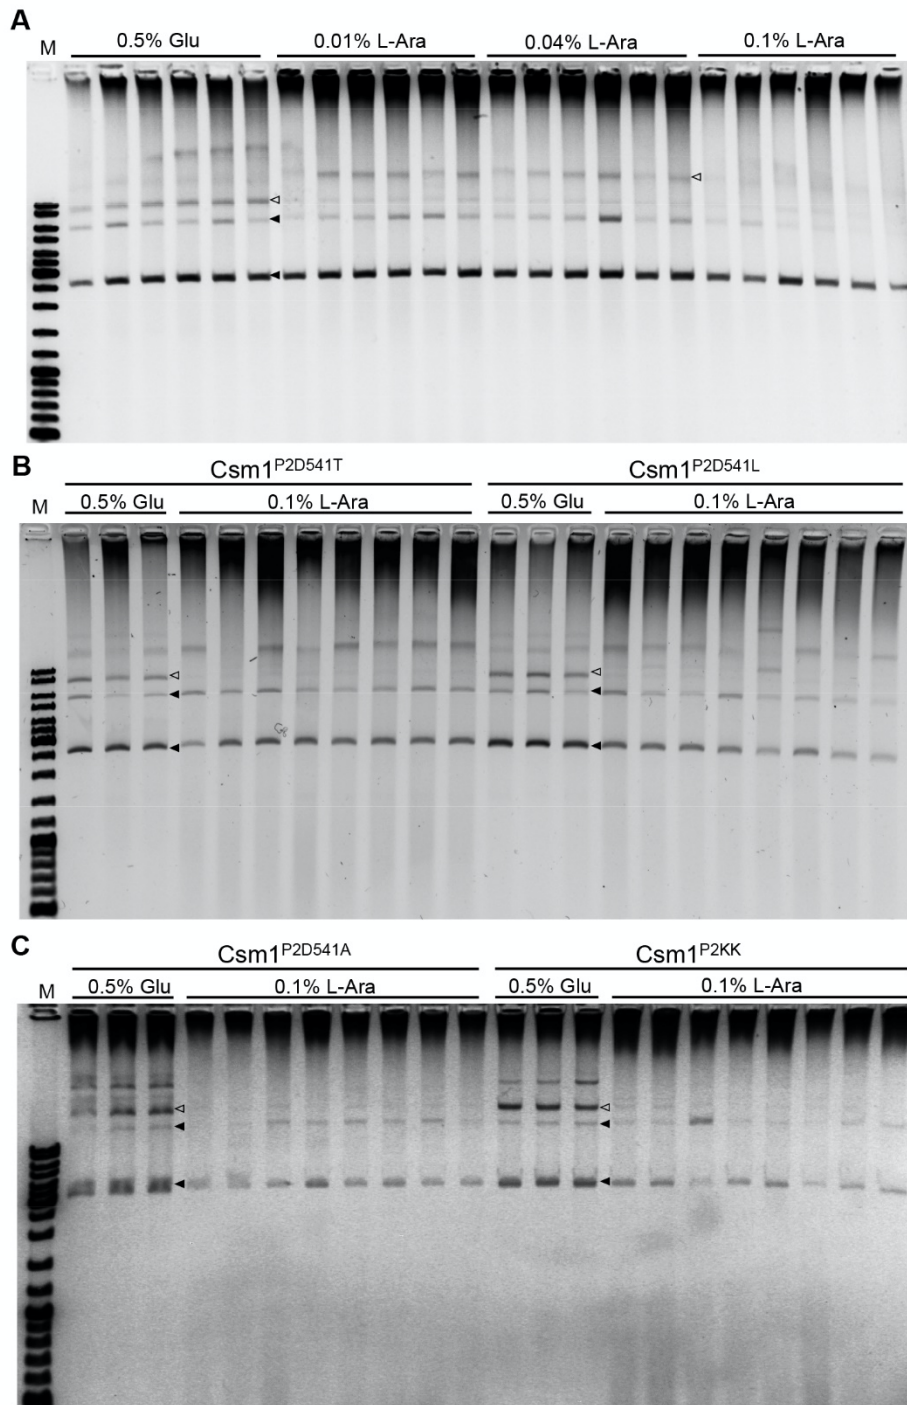

**Figure S6 Anti-plasmid efficiency of the wild-type and LdCsm1-mutated LdCsm systems.** The wild-type (A) and LdCsm1 mutated (B & C) LdCsm systems mediate efficient plasmid clearance preferably to nontarget plasmid in *E. coli*. The *E. coli* colonies of Csm1<sup>P2D541T</sup>, Csm1<sup>P2D541L</sup>, Csm1<sup>P2D541A</sup> and Csm1<sup>P2KK</sup> from Figure S4 were employed for plasmid miniprep. Empty triangles denote p15AIE-Cas-S1, the nontarget plasmid; filled triangles indicate pBad-CTR, the target plasmid.

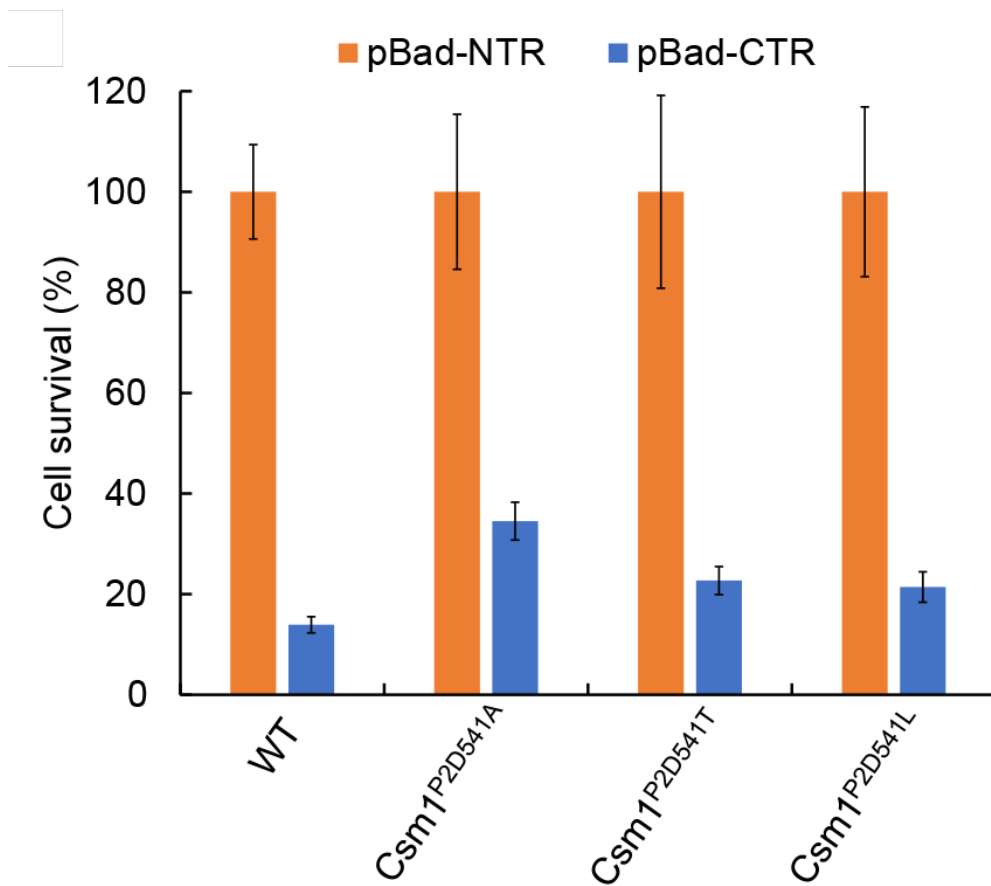

**Figure S7 Survival rates of *E. coli* cells in the stepwise induction cultures** Viable cells were determined for 120 min samples in **Figure 5A and 5B**. Viable cell counts with pBad-NTR were set up to 100% for each LdCsm effector, with which relative survival rates were calculated. Values shown are averages of three independent assays, bars representing the standard deviations.

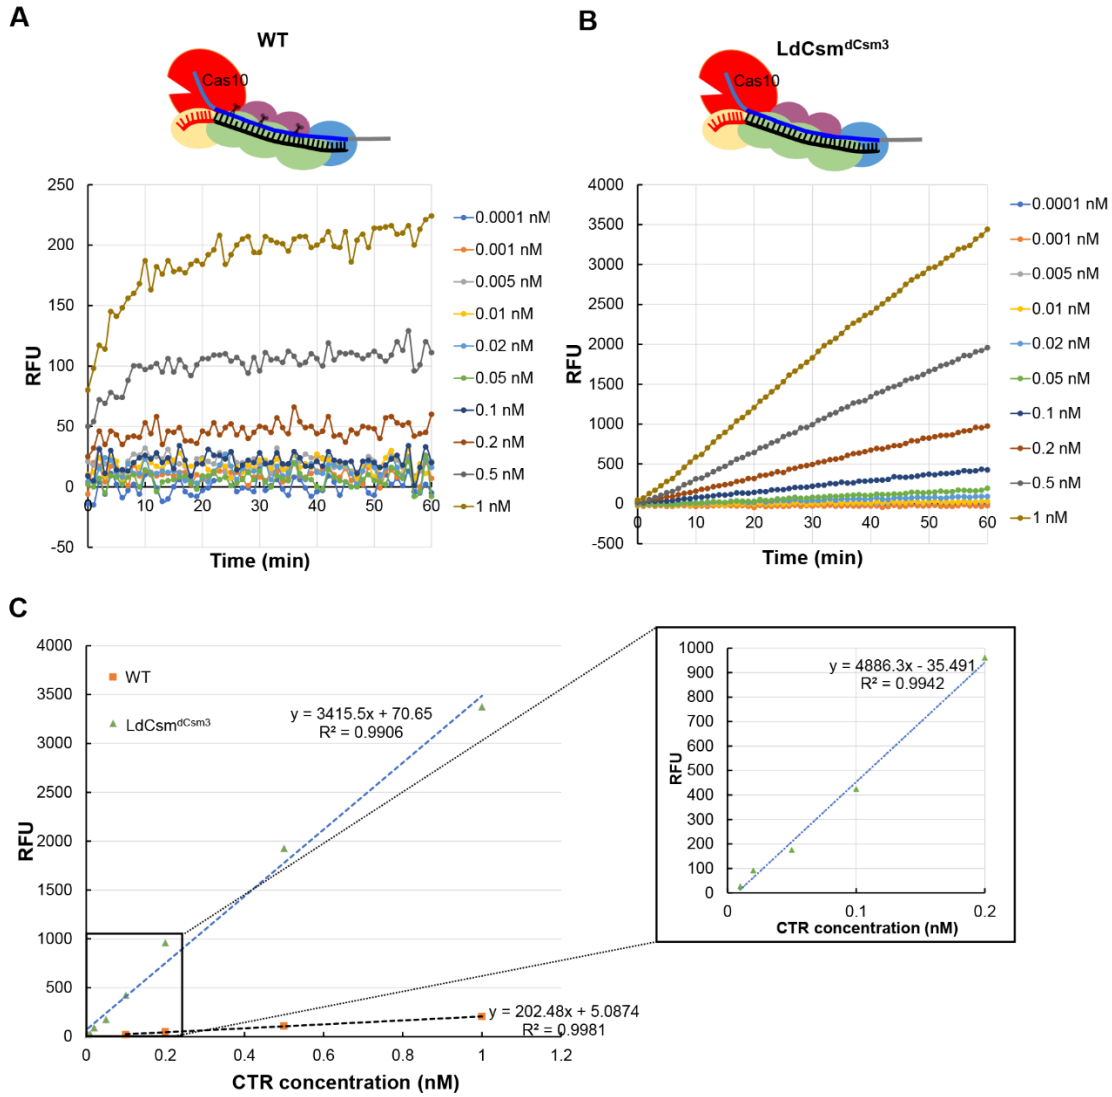

**Figure. S8 LdCsm<sup>dCsm3</sup> system may provide a potential platform for specific RNA quantification.** Quantified time-course fluorescence signal generated by WT LdCsm (A) and LdCsm<sup>dCsm3</sup> (B) effectors with varying concentrations of S1-46 RNA (CTR). (C) The fluorescence accumulation exhibits a positively linear relation to the increase of target RNA concentrations in a large range (0.01 nM to 1 nM for LdCsm<sup>dCsm3</sup> effector).

**Table S1 Nucleic acid oligo and substrates used in this study.**

| ssDNA and RNA oligos | Sequence (5'-3')                                                | Description                                                        |
|----------------------|-----------------------------------------------------------------|--------------------------------------------------------------------|
| Re-LPwt-F            | GCTAACAACTTATCTCCGCTAGAAGGAGACGAGAACGCAGCACTGA<br>AGGGCGGAAAC   | For plasmid pUCE-LPwt construction                                 |
| Re-LCwt-F            | GCTAACAACTTATCTCCGCTAGAAGGAGACGAGAACGCGGCACTGA<br>AGGGCGGAAAC   | For plasmid pUCE-LCwt construction                                 |
| Re-LPd-F             | GCTAACAACTTATCTCCGCTAGAAGGAGACGAGAACGCACCACTGA<br>AGGGCGGAAAC   | For plasmid pUCE-LPd construction                                  |
| Re-LCd-F             | GCTAACAACTTATCTCCGCTAGAAGGAGACGAGAACGCGCCACTGA<br>AGGGCGGAAAC   | For plasmid pUCE-LCd construction                                  |
| Re-L-R               | GTTCTCGTCTCCTTCTAGCGGAGATAAGTTGTTAGCGAATGCTAAGT                 | For plasmids pUCE-LPwt, pUCE-LCwt, pUCE-LPd, pUCE-LCd construction |
| L-R1                 | TGTTAGCGAATGCTAAGTGTGGAGGGTTTCCGCCCTTCAGTGG                     | For plasmids pUCE-LPwt, pUCE-LCwt, pUCE-LPd, pUCE-LCd construction |
| Csm1-S274A-F         | AGCTGCGGGCCCGGCATTTTACGTTG                                      | For LdCsm1 S274A mutation                                          |
| Csm1-S274A-R         | ATGCCCGGGCCCGCAGCTGCTTGTAAAGCTC                                 | For LdCsm1 S274A mutation                                          |
| Csm1N-H307A-F        | CAGAACAGCGCTGATGGTCTGCTTTTTATTG                                 | For LdCsm1 H307A mutation                                          |
| Csm1N-H307A-R        | GACCATCAGCGCTGTTCTGGTAAAGGATATTC                                | For LdCsm1 H307A mutation                                          |
| Csm1N-D541A-F        | TTGATGATCGCTATTGATGACCTCCATGCCAA                                | For LdCsm1 D541A mutation                                          |
| Csm1N-D541A-R        | CATCAATAGCGATCATCAAAGAAGCAAGC                                   | For LdCsm1 D541A mutation                                          |
| Csm1N-D543A-F        | GATCGATATTGCTGACCTCCATGCCAAATTCCT                               | For LdCsm1 D543A mutation                                          |
| Csm1N-D543A-R        | GAGGTCAGCAATATCGATCATCAAAGAAG                                   | For LdCsm1 D543A mutation                                          |
| Csm1N-S571A-F        | GGAACCTGCCAGAAGAATTGACATGTTC                                    | For LdCsm1 S571A mutation                                          |
| Csm1N-S571A-R        | AATTCTTCTGGCAAGTCCGCGAATCTGCTG                                  | For LdCsm1 S571A mutation                                          |
| Csm1N-K659/663A-F    | CAGCATTTGCCGGCGCGGACCGGATTGTGTGTTC                              | For LdCsm1 K659/663A mutation                                      |
| Csm1N-K659/663A-R    | CCGCGCCGGCAAATGCTGCTGTTCTTAACAGTTCC                             | For LdCsm1 S571A K659/663A mutation                                |
| Csm3-D34A-F          | GGTGCATCGCCAAACCGATAATTAAGGATCC                                 | For LdCsm3 D34A mutation                                           |
| Csm3-D34A-R          | ATCGGGTTGGCGATCGCACCAATAGCCGCA                                  | For LdCsm3 D34A mutation                                           |
| Sall-Cas6-F          | AGGGTCGACGTGCAGAAGATAAGTTTAGTTTG                                | For LdCsm1 Palm1 mutations                                         |
| SacI-Csm1-R          | CTCTGGAAGAGCTCAGCATAG                                           | For LdCsm1 Palm1 mutations                                         |
| SacI-Csm1-F          | CTATGCTGAGCTCTTCCAGAG                                           | For LdCsm1 Palm 2 mutations                                        |
| StuI-Csm1-R          | GTAATGAAGGCCTTACCTCG                                            | For LdCsm1 Palm 2 mutations                                        |
| StuI-Csm1-F          | CGAGGTAAGGCCTTCATTTAC                                           | For LdCsm3 D34A mutation                                           |
| KpnI-Csm4-R          | GACAGTGGTACCGCGTATAAGC                                          | For LdCsm3 D34A mutation                                           |
| Repeat-probe         | GTTCTCGTCTCCTTCTAGCGGAGATAAGTTGTTAGC                            | For p15AIE-Cas-S1 southern blotting                                |
| pBR322-probe         | TGGCCTTTTCTCACATGTTCTTCTGCGTTATCCCCTGATTCTGTG<br>GATAACCGTATT   | For pBad-CTR southern blotting                                     |
| Kan-probe            | GCTCGTCATCAAATCACTCGCATCAACCAAACCGTTATTCATTCGTG<br>ATTGCGCCTGAG | For pBad-CTR southern blotting                                     |
| <b>Nucleic acid</b>  |                                                                 |                                                                    |



**Table S2 Strains and plasmids utilized in this work.**

| <b>Strains</b>                                                 | <b>Reference</b>              | <b>Description</b>                                                    |
|----------------------------------------------------------------|-------------------------------|-----------------------------------------------------------------------|
| <i>Lactobacillus delbrueckii</i> subsp. <i>bulgaricus</i> ND04 | A donation from (LABCC, IMAU) | <a href="http://www.bio149.cn/">http://www.bio149.cn/</a>             |
| <i>Escherichia coli</i> JM109                                  | Home-made                     | N/A                                                                   |
| <i>E. coli</i> BL21 (DE3)                                      | Home-made                     | N/A                                                                   |
| <b>Plasmids</b>                                                | <b>Reference</b>              | <b>Description</b>                                                    |
| p15AIE-Cas                                                     | Lin et al. (3)                | N/A                                                                   |
| p15AIE-Cas(Csm1 <sup>P1S274A</sup> )                           | This study                    | A LdCsm1 mutant carrying S274A substitution in Palm1 domain           |
| p15AIE-Cas(Csm1 <sup>P1H307A</sup> )                           | This study                    | A LdCsm1 mutant carrying H307A substitution in Palm1 domain           |
| p15AIE-Cas(Csm1 <sup>P1SH</sup> )                              | This study                    | A LdCsm1 mutant carrying S274A and H307A substitution in Palm1 domain |
| p15AIE-Cas(Csm1 <sup>P2D541A</sup> )                           | This study                    | A LdCsm1 mutant carrying D541A substitution in Palm2 domain           |
| p15AIE-Cas(Csm1 <sup>P2D543A</sup> )                           | This study                    | A LdCsm1 mutant carrying D543A substitution in Palm2 domain           |
| p15AIE-Cas(Csm1 <sup>P2DxD</sup> )                             | Lin et al. (3)                | A LdCsm1 mutant carrying D541A and D543A substitution in Palm2 domain |
| p15AIE-Cas(Csm1 <sup>P2D541N</sup> )                           | This study                    | A LdCsm1 mutant carrying D541N substitution in Palm2 domain           |
| p15AIE-Cas(Csm1 <sup>P2D541T</sup> )                           | This study                    | A LdCsm1 mutant carrying D541T substitution in Palm2 domain           |
| p15AIE-Cas(Csm1 <sup>P2D541L</sup> )                           | This study                    | A LdCsm1 mutant carrying D541L substitution in Palm2 domain           |
| p15AIE-Cas(Csm1 <sup>P2S571A</sup> )                           | This study                    | A LdCsm1 mutant carrying S571A substitution in Palm2 domain           |
| p15AIE-Cas(Csm1 <sup>P2DD</sup> )                              | Lin et al. (3)                | A LdCsm1 mutant carrying D599A and D600A substitution in Palm2 domain |
| p15AIE-Cas(Csm1 <sup>P2KK</sup> )                              | This study                    | A LdCsm1 mutant carrying K659A and K663A substitution in Palm2 domain |
| p15AIE-Cas <sup>dCsm3</sup>                                    | This study                    | A LdCsm3 mutant carrying D34A substitution                            |
| p15AIE-Cas-S1                                                  | Lin et al. (3)                | N/A                                                                   |
| p15AIE-Cas(Csm1 <sup>P2D541A</sup> )-S1                        | This study                    | A LdCsm1 mutant carrying D541A substitution in Palm2 domain           |
| p15AIE-Cas(Csm1 <sup>P2D541N</sup> )-S1                        | This study                    | A LdCsm1 mutant carrying D541N substitution in Palm2 domain           |
| p15AIE-Cas(Csm1 <sup>P2D541T</sup> )-S1                        | This study                    | A LdCsm1 mutant carrying D541T substitution in Palm2 domain           |
| p15AIE-Cas(Csm1 <sup>P2D541L</sup> )-S1                        | This study                    | A LdCsm1 mutant carrying D541L substitution in Palm2 domain           |

|                                      |                |                                                                                                       |
|--------------------------------------|----------------|-------------------------------------------------------------------------------------------------------|
| p15AIE-Cas(Csm1 <sup>P2KK</sup> )-S1 | This study     | substitution in Palm2 domain<br>A LdCsm1 mutant carrying K659A and K663A substitution in Palm2 domain |
| pUCE                                 | Lin et al. (3) | N/A                                                                                                   |
| pUCE-S1                              | Lin et al. (3) | N/A                                                                                                   |
| pUCE-LPwt                            | This study     | A plasmid carrying spacer for <i>L. plantarum</i> 16S rRNA detection using WT LdCsm                   |
| pUCE-LCwt                            | This study     | A plasmid carrying spacer for <i>L. casei</i> 16S rRNA detection using WT LdCsm                       |
| pUCE-LPd                             | This study     | A plasmid carrying spacer for <i>L. plantarum</i> 16S rRNA detection using with LdCsm3 dead mutant    |
| pUCE-LCd                             | This study     | A plasmid carrying spacer for <i>L. casei</i> 16S rRNA detection using with LdCsm3 dead mutant        |
| pET30a-Csm2                          | Lin et al. (3) | N/A                                                                                                   |
| pBad-G                               | Lin et al. (3) | N/A                                                                                                   |
| pBad-CTR                             | Lin et al. (3) | N/A                                                                                                   |
| pBad-NTR                             | Lin et al. (3) | N/A                                                                                                   |

## REFERENCE

1. Tamura, K., Peterson, D., Peterson, N., Stecher, G., Nei, M. and Kumar, S. (2011) MEGA5: molecular evolutionary genetics analysis using maximum likelihood, evolutionary distance, and maximum parsimony methods. *Mol Biol Evol*, **28**, 2731-2739.
2. Robert, X. and Gouet, P. (2014) Deciphering key features in protein structures with the new ENDscript server. *Nucleic Acids Res*, **42**, W320-324.
3. Lin, J., Feng, M., Zhang, H. and She, Q. (2020) Characterization of a novel type III CRISPR-Cas effector provides new insights into the allosteric activation and suppression of the Cas10 DNase. *Cell Discov*, **6**, 29.
